# Supplementary material for: The Feasibility of Using Computrition Software for Nutrition Research—A Pilot Study
Source: MDPI journal article supplement (doi:10.3390/nu13020329), 2021-01-23
Supplement: s1 [file s1]

Supplemental Table S1. Targeted sodium percentage for each meal by diet and calorie level.

| Percentage Sodium for Low Sodium, 1750kcal |       |       |       |       |       |       |       | Percentage Sodium for Typical Sodium, 1750kcal |       |       |       |       |       |       |       |
|--------------------------------------------|-------|-------|-------|-------|-------|-------|-------|------------------------------------------------|-------|-------|-------|-------|-------|-------|-------|
|                                            | Day 1 | Day 2 | Day 3 | Day 4 | Day 5 | Day 6 | Day 7 |                                                | Day 1 | Day 2 | Day 3 | Day 4 | Day 5 | Day 6 | Day 7 |
| Breakfast                                  | 18%   | 22%   | 17%   | 8%    | 26%   | 10%   | 32%   | Breakfast                                      | 10%   | 11%   | 6%    | 14%   | 14%   | 26%   | 20%   |
| Lunch                                      | 34%   | 43%   | 57%   | 24%   | 44%   | 43%   | 23%   | Lunch                                          | 15%   | 39%   | 34%   | 34%   | 27%   | 30%   | 36%   |
| Snack 1                                    | 5%    | 0%    | 8%    | 7%    | 7%    | 1%    | 12%   | Snack 1                                        | 1%    | 0%    | 3%    | 4%    | 4%    | 0%    | 3%    |
| Dinner                                     | 42%   | 35%   | 9%    | 60%   | 23%   | 39%   | 33%   | Dinner                                         | 74%   | 49%   | 54%   | 44%   | 56%   | 41%   | 42%   |
| Snack 2                                    | 0%    | 0%    | 8%    | 0%    | 0%    | 7%    | 2%    | Snack 2                                        | 0%    | 0%    | 3%    | 4%    | 0%    | 3%    | 0%    |
| Percentage Sodium for Low Sodium, 2000kcal |       |       |       |       |       |       |       | Percentage Sodium for Typical Sodium, 2000kcal |       |       |       |       |       |       |       |
|                                            | Day 1 | Day 2 | Day 3 | Day 4 | Day 5 | Day 6 | Day 7 |                                                | Day 1 | Day 2 | Day 3 | Day 4 | Day 5 | Day 6 | Day 7 |
| Breakfast                                  | 14%   | 20%   | 13%   | 8%    | 23%   | 29%   | 29%   | Breakfast                                      | 9%    | 9%    | 6%    | 14%   | 12%   | 21%   | 15%   |
| Lunch                                      | 35%   | 47%   | 68%   | 29%   | 39%   | 34%   | 21%   | Lunch                                          | 19%   | 41%   | 39%   | 39%   | 23%   | 38%   | 31%   |
| Snack 1                                    | 4%    | 0%    | 6%    | 7%    | 11%   | 2%    | 6%    | Snack 1                                        | 2%    | 0%    | 3%    | 3%    | 6%    | 0%    | 3%    |
| Dinner                                     | 42%   | 32%   | 7%    | 48%   | 26%   | 31%   | 42%   | Dinner                                         | 67%   | 50%   | 49%   | 40%   | 60%   | 38%   | 51%   |
| Snack 2                                    | 5%    | 0%    | 6%    | 7%    | 0%    | 5%    | 4%    | Snack 2                                        | 3%    | 0%    | 3%    | 4%    | 0%    | 2%    | 1%    |
| Percentage Sodium for Low Sodium, 2250kcal |       |       |       |       |       |       |       | Percentage Sodium for Typical Sodium, 2250kcal |       |       |       |       |       |       |       |
|                                            | Day 1 | Day 2 | Day 3 | Day 4 | Day 5 | Day 6 | Day 7 |                                                | Day 1 | Day 2 | Day 3 | Day 4 | Day 5 | Day 6 | Day 7 |
| Breakfast                                  | 18%   | 17%   | 11%   | 8%    | 20%   | 25%   | 30%   | Breakfast                                      | 9%    | 8%    | 5%    | 20%   | 11%   | 20%   | 16%   |
| Lunch                                      | 40%   | 56%   | 72%   | 36%   | 35%   | 30%   | 35%   | Lunch                                          | 20%   | 46%   | 42%   | 37%   | 28%   | 36%   | 37%   |
| Snack 1                                    | 5%    | 0%    | 5%    | 0%    | 10%   | 2%    | 5%    | Snack 1                                        | 2%    | 0%    | 3%    | 3%    | 5%    | 0%    | 1%    |
| Dinner                                     | 33%   | 27%   | 7%    | 48%   | 30%   | 40%   | 28%   | Dinner                                         | 67%   | 45%   | 48%   | 36%   | 53%   | 42%   | 44%   |
| Snack 2                                    | 5%    | 0%    | 5%    | 7%    | 5%    | 5%    | 2%    | Snack 2                                        | 3%    | 0%    | 2%    | 3%    | 3%    | 2%    | 2%    |

Supplemental Table S2. Baseline characteristics of all participants by meal plan.

|                                | <b>All Participants (n=20)</b> |                      |         |
|--------------------------------|--------------------------------|----------------------|---------|
|                                | Typical Sodium<br>(n=9)        | Low Sodium<br>(n=11) | P-value |
| Age (y, range 64-91)           | 79.5 ± 9.4                     | 77.0 ± 6.2           | 0.48    |
| Female, n (%)                  | 9 (100)                        | 10 (91)              | 0.35    |
| Caucasian, n (%)               | 9 (100)                        | 10 (91)              | 0.35    |
| Height (cm)                    | 154.4 ± 5.1                    | 157.8 ± 6.2          | 0.21*   |
| Weight (kg)                    | 76.7 ± 20.9                    | 80.6 ± 16.9          | 0.65    |
| BMI (kg/m <sup>2</sup> )       | 32.1 ± 8.1                     | 32.5 ± 7.5           | 0.90    |
| Caloric Intake (kcal/d)        | 1785 ± 322                     | 1849 ± 235           | 0.61    |
| Physical Activity Score        | 22.8 ± 13.7                    | 15.9 ± 15.1          | 0.31    |
| Current Smoking, n (%)         | 0 (0)                          | 2 (18)               | 0.18*   |
| Hypertensive Medication, n (%) | 5 (56)                         | 7 (64)               | 0.71    |
| CVD Conditions, n (%)          | 7 (64)                         | 6 (67)               | 0.89    |
| GI Conditions, n (%)           | 1 (11)                         | 3 (27)               | 0.37    |
| Diabetes, n (%)                | 3 (33)                         | 3 (27)               | 0.77    |
| Cancer, n (%)                  | 2 (22)                         | 1 (9)                | 0.41    |

\*= p<0.25 was pre-specified as statistically significant
